## 23 **Abstract**

24           Understanding the epidemiology and ecology of yellow fever in endemic regions is  
25 critical for preventing future outbreaks. Ghana is a high-risk country for yellow fever. In this  
26 study we estimate the epidemiology, ecological cycles, and areas at risk for yellow fever in  
27 Ghana based on historical outbreaks. We identify 2371 cases and 887 deaths (case fatality rate  
28 37.4%) from yellow fever reported in Ghana from 1910 to 2022. Since implementation of routine  
29 childhood vaccination in 1992, the estimated mean annual number of cases decreased by 81%  
30 and the geographic distribution of yellow fever cases also changed. While there have been  
31 multiple large historical outbreaks of yellow fever in Ghana from the urban cycle, recent  
32 outbreaks have originated among unvaccinated nomadic groups in rural areas with the  
33 sylvatic/savanna cycles. Using machine learning and an ecological niche modeling framework,  
34 we predict areas in Ghana that are similar to where prior yellow fever outbreaks have originated  
35 based on temperature, precipitation, landcover, elevation, and human population density. We  
36 find differences in predictions depending on the ecological cycles of outbreaks. Ultimately, these  
37 findings and methods could be used to inform further subnational risk assessments for yellow  
38 fever in Ghana and other high-risk countries.

39

## 40 **Author Summary**

41           Yellow fever is a viral hemorrhagic fever transmitted by mosquitoes in Africa and South  
42 America through different ecological transmission cycles. While West Africa has had the most  
43 cases of yellow fever, less is known about the epidemiology and ecology of yellow fever among  
44 countries in this region. Ghana has had multiple yellow fever outbreaks, including a recent  
45 outbreak in 2021-2022. In this study we estimate cases and deaths due to yellow fever in Ghana,

46 compare the ecological cycles of outbreaks, and predict future areas at risk based on prior yellow  
47 fever cases and environmental conditions. We find that the populations at risk for yellow fever in  
48 Ghana have changed over the past century and that different ecological factors influence the risk  
49 of future emergence. Understanding these changes and the nuances of yellow fever epidemiology  
50 and ecology within countries will be important for future outbreak preparedness.

51

## 52 **Introduction**

53         Yellow fever (YF) outbreaks continue to occur in Africa and South America despite an  
54 effective vaccine having been created nearly a century ago. Yellow fever is a viral hemorrhagic  
55 fever caused by yellow fever virus (YFV), a mosquito-borne flavivirus. In Africa, YFV  
56 circulates through three transmission cycles. In the sylvatic cycle, forest-dwelling *Aedes* spp.  
57 mosquitoes infect non-human primates (NHPs) and intermittently transmit YFV to humans after  
58 feeding on infected NHPs [1]. In the savanna or intermediate cycle, humans are infected by  
59 mosquitoes in forest border areas, and there is human-to-human and NHP-to-human transmission  
60 via mosquito vectors [1]. In the urban cycle, there is only transmission among humans from the  
61 anthropophilic mosquito *Aedes aegypti*, which breeds in water-containing vessels in urban sites  
62 [1]. While all three transmission cycles cause human cases of YF in Africa, it remains unknown  
63 how each cycle contributes to the burden of YF, limiting targeted interventions and predictive  
64 models [2,3].

65         Among infectious diseases in the WHO Africa Region (AFRO), YF caused the fifth most  
66 outbreaks in 2020 [4]. And while there are more cases of YF in West Africa compared to  
67 anywhere else in the world, a recent systematic review found only 12 studies of YF incidence  
68 and mortality within African countries [5]. Compounding the limited knowledge of the historical

69 burden of YF, there are gaps in predicting future emergence of YF within African countries, and  
70 it is unknown how each of the three transmission cycles (sylvatic, savanna, and urban) contribute  
71 to YF outbreaks.

72         There is a contrasting situation in South America, where all outbreaks of YF in Brazil  
73 have been attributed to the sylvatic cycle since 1942 and there are known seasonal and climatic  
74 drivers of outbreaks [6]. In addition, some species of New World NHPs develop lethal infections  
75 due to YFV, and the finding of moribund or dead NHPs can indicate an epizootic outbreak,  
76 signaling impending sylvatic YF outbreaks among humans [1]. In contrast, most YFV infections  
77 among Old World NHPs in Africa are believed to be inapparent or subclinical, and therefore  
78 outbreaks from sylvatic and savanna transmission occur without alerting indicators in Africa.  
79 Initial sylvatic or savanna outbreaks could lead to epidemics if the urban cycle subsequently  
80 becomes established. Therefore, understanding the historical epidemiology and ecology of YF is  
81 crucial to predicting future emergence among YF-endemic African nations.

82         There is also concern for YF outbreaks within African countries to cause epidemics. In  
83 2016 a YF outbreak in Angola spread to neighboring countries, and the epidemic response  
84 required more than 28 million YF vaccines, exhausting the global YF vaccine supply [7]. In  
85 response to this YF epidemic, the WHO, GAVI, and UNICEF developed the Eliminate Yellow  
86 Fever Epidemics (EYE) strategy with the aim of eliminating yellow fever epidemics by 2026 [7].  
87 The core objectives of the EYE strategy are to (1) protect at-risk populations, (2) prevent  
88 international spread, and (3) contain outbreaks rapidly [8]. Central to achieving these objectives  
89 is understanding the regions and populations at greatest risk for YF outbreaks. Ghana is among  
90 the 27 countries identified by EYE as being high-risk for YF and has had multiple YF outbreaks.

91           Understanding the contexts of YF outbreaks in Ghana and identifying areas at future risk  
92 could inform resource allocation for vaccination campaigns, vector control, and diagnostic  
93 testing. Modeling tools could aid risk assessment for YF by predicting areas at risk based on  
94 prior outbreaks. For zoonotic and vector-borne diseases like YF, the locations of cases, vectors,  
95 or hosts can be used to create spatial models which can be translated into risk maps [9]. For  
96 example, researchers have predicted the local risk for sylvatic YF in Brazil from models based  
97 on human and NHP cases as well as ecological factors [10,11].

98           Through combining epidemiological data from historical YF outbreaks with local  
99 ecological knowledge, we aim to predict the habitats and factors associated with YF in Ghana.  
100 Because there are limited data on the multiple *Aedes* spp. and NHPs that may propagate YFV  
101 circulation in Ghana, we use a machine learning approach incorporating confirmed human YF  
102 cases as inputs and multiple abiotic and biotic covariates as explanatory variables. Ultimately,  
103 our overall goals are to (1) review the historical epidemiology of YF outbreaks in Ghana, (2)  
104 assess contributions of different YF ecological cycles to these outbreaks, and (3) identify areas at  
105 risk for YF emergence based on this historical and ecological understanding.

106

## 107 **Methods**

### 108 *Setting*

109           The Republic of Ghana is a country in West Africa on the Gulf of Guinea, bordered by  
110 Côte d'Ivoire, Burkina Faso, and Togo. Ghana consisted of 10 regions until December 2018  
111 when the Brong-Ahafo, Northern, Volta, and Western regions were split to make a total of 16  
112 regions. For the purposes of this study, we used the current geographic boundaries of the 16  
113 regions and 260 districts in Ghana. For outbreaks prior to 2019 with available geographic

114 information, we re-classified these locations to align with the current terminology for regions and  
115 districts. We also compared outbreak locations by the five recently proposed agro-climatic zones  
116 for Ghana, which are named from north to south: Sudan Savannah, Guinea Savannah, Transition  
117 Zone, Forest, and Coastal [12]. These zones encompass geographic regions with similar  
118 temperature and precipitation patterns [12].

119 The Government of Ghana introduced the YF vaccine as part of the Expanded Program  
120 on Immunization (EPI) in 1992, making it a routine immunization for children in Ghana.  
121 Although the WHO estimates that 95% of the population in Ghana has been vaccinated against  
122 YF [13], Ghana had a recent YF outbreak from October 2021 to February 2022 with 70  
123 confirmed cases and 35 deaths [14]. The origin and epicenter of the outbreak was in the West  
124 Gonja district of the Savannah region, among unvaccinated nomadic populations, from which the  
125 outbreak spread to other regions [15,16]. We reviewed the epidemiology of this latest outbreak  
126 and prior outbreaks using the methods described below.

127

### 128 *Identifying YF Outbreaks in Ghana*

129 To identify YF outbreaks in Ghana and the locations of corresponding cases, we searched  
130 PubMed, EBSCO, Google Scholar, and Scopus for literature using the search terms “yellow  
131 fever” AND “Ghana.” We also searched the ProMed archives using the same search terms. To  
132 find WHO YF reports, we used the WHO’s Institutional Repository for Information Sharing  
133 (IRIS) and queried the Medical Subject Heading (MeSH) “yellow fever”, which included the  
134 Disease Outbreak News (DON) and Weekly Epidemiology Record (WER). This also included a  
135 2000 WHO report which included YF case reporting among countries from 1950-1998 [17]. We  
136 also reviewed additional WHO documents, including a 2005 report on YF in Ghana [18] which

137 was referenced in a review of arboviruses in Ghana [19]. Finally, we reviewed publicly available  
138 online reports from the Ghana Health Service (GHS) and the Ghana Weekly Epidemiological  
139 Report. The literature search was conducted up to October 20th 2023. We collated all of the data  
140 from the aforementioned sources into a dataset of reported annual YF cases, deaths, and case  
141 fatality rates (CFR) for individuals in Ghana, as well as a dataset of outbreaks in Ghana  
142 (locations, month of outbreak onset, and reactive vaccination campaigns) [20].

143

#### 144 *Estimating Annual YF Cases and Outbreak Characteristics*

145 For the period from 1910-1950, we extracted YF cases, deaths, and outbreak  
146 characteristics primarily from a single source (Scott 1965) [21]. For 1950-2022, we compared  
147 YF cases and deaths between multiple sources, including the primary literature and WHO  
148 reports. If there was a discrepancy in annual cases/deaths, we used the total cases/deaths reported  
149 in the primary literature, given delays between reporting cases and confirmatory testing.

150 We excluded cases from 2003 which were reported only in the WHO 2005 report [18]  
151 because we could not find these cases referenced in another source. We were also unable to find  
152 deaths reported for 31 cases in 2012 [22]. If the source distinguished between reported and  
153 confirmed cases, as well as diagnostics used, we also included this information in our  
154 dataset. For our calculations of disease burden and CFR, we used overall reported cases and  
155 deaths.

156

#### 157 *Categorizing YF Outbreaks According to Likely Transmission Cycles*

158 For outbreaks with sufficient epidemiological information (including location details,  
159 diagnostic method, and vector surveillance), we categorized the outbreaks as likely occurring due

160 to the urban, sylvatic, or savanna cycles [20]. If vector surveillance identified sufficient *A.*  
161 *aegypti* based on the indices described below, or if the outbreak was concentrated around urban  
162 dwellings or structures (i.e. wells or water storage containers) then these outbreaks were  
163 attributed to the urban cycle. Outbreaks where vector surveillance revealed insufficient *A.*  
164 *aegypti* and/or cases originated in forest or savanna habitat were attributed to the sylvatic or  
165 savanna cycle. Given limitations in distinguishing between the sylvatic and savanna cycles, these  
166 were considered together for our modeling analyses.

167 For categorizing urban YF, we considered the following vector indices: (1) house index  
168 (% of houses with at least one positive breeding place), (2) container index (% containers with *A.*  
169 *aegypti* larvae), and (3) Breteau index (# of positive larval breeding places per 100 houses) [23].  
170 There is a high risk for urban YF when the house index > 35, container index > 20, and Breteau  
171 index > 50 [23]. If the Breteau index is between 5 and 50, then there is considered to be  
172 sufficient *A. aegypti* to cause an outbreak. There is unlikely to be urban transmission of  
173 YFV when the house index <4, container index <3, and Breteau index <5 [23].

174

#### 175 *Georeferencing YF Occurrences*

176 To obtain occurrence data for our models, we identified the locations of laboratory  
177 confirmed human YF cases in Ghana. A panel of YF experts had previously determined that one  
178 of the most important risk factors for YF in the African region was confirmed YF cases since  
179 1960 [24]. Therefore, we included only confirmed cases since 1960 for our models. We  
180 georeferenced each case to the town of residence; if this was unknown then we used the location  
181 of the healthcare facility where the patient was evaluated. To improve precision, we excluded



182 cases that were only referenced at the region or district level. Our methods for georeferencing are  
183 further described in S1 text.

184 To mitigate sampling bias, we treated multiple cases at the same location in a year as a  
185 single occurrence. We also excluded locations that were within 1 km of another occurrence,  
186 given our spatial resolution of covariates at 30 arc seconds (~1 km<sup>2</sup>). We categorized the  
187 transmission cycles of occurrences as described above.

188 Through this process we identified 21 occurrences for YF in Ghana from 1960-2022. We  
189 categorized six of these occurrences as being due to the urban cycle given positive vector indices  
190 for *A. aegypti*. Additional details on the occurrences are available in the online dataset and S1  
191 text. To compare the regional distribution of YF cases as well as districts where YF outbreaks  
192 have originated, we created maps in ArcGIS Pro (<https://www.esri.com>).

193

#### 194 *Modeling Habitat Suitability for YF Emergence*

195 To identify suitable habitats for YF emergence, we built on a previously described  
196 approach that is optimized for small sample sizes to identify habitat suitability for pathogen  
197 spillover [25]. We also used a similar methodology and covariates as those that were recently  
198 used to model YF emergence in Brazil [11]. We used Maximum Entropy Species Distribution  
199 Modeling (Maxent) version 3.3.3 [26], a machine learning algorithm commonly used in species  
200 distribution modeling and ecological niche modeling, to predict the distribution of a species  
201 based on presence locations as input and multiple ecological covariates. We chose Maxent given  
202 that it has outperformed other modeling algorithms for small sample sizes with presence-only  
203 data, including in environments in Africa [27]. Our aim was to model the environments suitable  
204 for YF emergence in Ghana, as well as to explore the relative importance of different abiotic,

205 biotic, and human covariates. Therefore, instead of making the stringent assumptions to interpret  
206 Maxent output as an ecological niche, we instead built our models to indicate habitat suitability  
207 [28].

208 We modeled YF habitat suitability as a function of multiple covariates (Table 1). These  
209 covariates were identified as factors that could influence the ecological cycles of YF and  
210 included (1) abiotic covariates: 19 bioclimatic variables and elevation (WorldClim 2.1,  
211 <https://www.worldclim.org>) [29], (2) biotic covariates: landcover (MODIS MCD12Q1,  
212 <https://www.earthdata.nasa.gov>) [30] and NHP species richness  
213 (<https://sedac.ciesin.columbia.edu/data/set/species-global-mammal-richness-2015>) [31], and (3)  
214 human population density ([https://sedac.ciesin.columbia.edu/data/set/gpw-v4-population-](https://sedac.ciesin.columbia.edu/data/set/gpw-v4-population-density-adjusted-to-2015-unwpp-country-totals-rev11)  
215 [density-adjusted-to-2015-unwpp-country-totals-rev11](https://sedac.ciesin.columbia.edu/data/set/gpw-v4-population-density-adjusted-to-2015-unwpp-country-totals-rev11)) [32].

216 To identify potential NHPs that could propagate the sylvatic/savanna cycles, we  
217 referenced the IUCN Red List (<https://www.iucnredlist.org/>) and identified 17 species of NHPs  
218 in Ghana. Of these species, six had epidemiological and laboratory evidence of YF infection at  
219 the species level (*Cercopithecus mona*, *Colobus vellerosus*, *Erythrocebus patas*, *Pan troglodytes*,  
220 *Papio anubis*, *Perodicticus potto*), and three had evidence at the genus level (*Cercopithecus*  
221 *lowei*, *Cercopithecus petaurista*, and *Cercopithecus roloway*) [24]. Eight of these nine species  
222 are members of the Cercopithecidae family. The exception was *P. troglodytes*, which is not a  
223 common species in Ghana and is unlikely to have a significant role in YF ecology [24].  
224 Therefore, we evaluated species richness of Old World monkeys (Cercopithecidae) as a  
225 covariate. Further details about the covariates are available in S1 text.

226

227

Table 1. Explanatory covariates for YF habitat suitability models

| Covariate                                               | Details                                                                           | Resolution                         | Source                                                    |
|---------------------------------------------------------|-----------------------------------------------------------------------------------|------------------------------------|-----------------------------------------------------------|
| 19 bioclimatic variables                                | Gridded climate data 1970-2000                                                    | 30 arc seconds/1 km <sup>2</sup>   | Worldclim 2.1                                             |
| Elevation                                               | Derived from the Shuttle Radar Tomography (SRTM) elevation data                   | 30 arc seconds/1 km <sup>2</sup>   | Worldclim 2.1                                             |
| Species richness of Old World monkeys (Cercopithecidae) | Gridded values of the number of species of Cercopithecidae from the IUCN Red list | 30 arc seconds/1 km <sup>2</sup>   | Global Mammal Richness Grids, 2015 Release (2013) (SEDAC) |
| Landcover                                               | Moderate Resolution Imaging Spectroradiometer (MODIS) Land Cover from 2021-2023   | 500 m resolution re-scaled to 1 km | MODIS MCD12Q1 NASA                                        |
| Human population density                                | 2020 UN adjusted population density                                               | 30 arc seconds/1 km <sup>2</sup>   | UN WPP-Adjusted population density v4.11 (SEDAC)          |

228

229 We created one set of models with all YF occurrences undifferentiated by ecological  
 230 cycle, to predict areas with habitat suitability for YF irrespective of cycle. We created another set  
 231 of models which excluded the six urban occurrences that had confirmed positive *A. aegypti*  
 232 vector indices. For our model parameters, we used a leave-one out cross-validation (LOOCV)  
 233 method that is optimized for small sample sizes [25,33]. To make our models comparable to  
 234 recent Maxent models for YF from Brazil, we used similar Maxent parameters and methods for  
 235 selecting covariates [11].

236 We ran our initial models in Maxent with all covariates, using a jackknife procedure to  
 237 evaluate relative covariate importance. For our initial models, we used the default Maxent  
 238 settings and additionally selected random seed, replicated run type as cross validate, replicates  
 239 equal to the sample size, and set the maximum iterations to 100,000. To identify collinearity  
 240 among covariates, we used a correlation matrix in ArcGIS Pro. We removed covariates that had  
 241 >70% correlation as well as those with less than 5% percent contribution and permutation

242 importance. We used both of these metrics and the jackknife test to compare the relative  
243 importance of covariates. Percent contribution was deemed less informative than the other  
244 metrics since it is determined heuristically and depends on the sequence of covariates [34].

245       Following this exclusion of potentially less-relevant covariates, we re-ran the models  
246 using the same LOOCV approach and settings. We used the cumulative output of the Maxent  
247 models as a representation of habitat suitability, where the value of each cell is the sum of all raw  
248 values less than or equal to the value for that location and rescaled from 0 to 100 [28]. The  
249 cumulative output can be used to create binary maps and determine omission rates for the  
250 models. For the binary maps and omission rates we used the minimum training presence  
251 cumulative threshold, which corresponds to the minimum habitat suitability in the training data.  
252 To compare the relative performance of the Maxent models we used the area under the receiver  
253 operating characteristic curve (AUC), which ranges from 0 to 1 and reflects the probability that  
254 randomly chosen presence locations are ranked higher than background points [28].

## 255 256 **Results**

257       We identified 2371 cases and 887 deaths due to YF in Ghana from 1910 to 2022. The  
258 overall mean CFR was 37.4%. The first definitive outbreak of YF in Ghana occurred in 1910.  
259 From 1910-1960 there were 569 cases and 335 deaths (CFR 58.9%). In 1945 YF vaccination  
260 became required for foreigners in Ghana, and the first reactive mass vaccination campaign for  
261 YF in Ghana occurred in 1951. We identified 12 reactive vaccination campaigns from 1951-2022  
262 (Fig S1).

263       We successfully identified the regions in which 1722/1802 (95.6%) of reported cases  
264 from 1960 to 2022 occurred (Fig 1). From 1960-1992 there were 1511 cases and 478 deaths  
265 (CFR 31.6%) that occurred in 11 of Ghana's 16 regions. The greatest number of YF cases were

266 reported in Upper West (n=384), Volta (n=340), Eastern (n=250), Upper East (n=163), Savannah  
267 (n=124), and Bono (n=105) regions. Following implementation of routine childhood YF  
268 vaccination in 1992, the mean annual number of YF cases fell by 81%. From 1992-2022 there  
269 were 291 cases and 70 deaths (CFR 24.1%) with the highest number of cases in the Upper West  
270 (n = 135), Savannah (n = 45), and Upper East (n=33) regions and few cases in the southern  
271 regions. The districts where YF outbreaks were suspected to originate in Ghana based on  
272 primary/index cases are shown in Fig 2.

273

#### 274 **Fig 1. Yellow Fever Cases Reported by Region in Ghana**

275 Reported YF cases that could be located on a regional level in Ghana are shown for the periods  
276 before and after routine childhood YF vaccination, 1960-1992 and 1993-2022. The regions of  
277 historical cases have been updated to match the current terminology for the 16 regions in Ghana.

278

#### 279 **Fig 2. Yellow Fever Outbreak Origins by District in Ghana**

280 The districts where reported YF outbreaks were suspected to originate in Ghana based on  
281 primary/index cases are shown for the periods before and after routine childhood YF vaccination,  
282 1960-1992 and 1993-2022. Also shown is Mole National Park and the West Gonja District  
283 where the 2021 and 1983 outbreaks were suspected to originate. For the purposes of this figure,  
284 outbreaks are defined as more than one case of YF.

285

286 We identified certain outbreaks and cases that could be categorized as likely due to  
287 urban, savanna, and sylvatic cycles in Ghana (Table 2). Of eleven outbreaks with available  
288 epidemiological data that occurred between 1910 and 1979, we estimated that nine likely

289 corresponded to the urban cycle. One outbreak (1983) had evidence of starting in the  
290 sylvatic/savanna cycles and then spreading through the urban cycle, and at least two recent  
291 outbreaks appear to have originated via the sylvatic/savanna cycles. In addition to these  
292 outbreaks there have been sporadic individual cases likely from the sylvatic/savanna cycles.  
293

Table 2. Select YF outbreaks and cases in Ghana with epidemiologic details from 1910-2022\*

| Year | Region        | Initial location             | Agro-climatic zone     | Suspected Cycle           | Details                                                                         | Ref  |
|------|---------------|------------------------------|------------------------|---------------------------|---------------------------------------------------------------------------------|------|
| 1910 | Western       | Sekondi                      | Coastal                | urban                     | cases in confined area near commercial waterfront/dwellings                     | [21] |
| 1926 | Eastern       | Asamankese                   | Forest                 | urban                     | outbreak confined within town, “aedes index” 89%                                | [21] |
| 1927 | Greater Accra | Accra                        | Coastal                | urban                     | outbreak around particular dwellings                                            | [21] |
| 1937 | Greater Accra | Accra                        | Coastal                | urban                     | localized outbreak around a well with <i>A. aegypti</i>                         | [21] |
| 1955 | Bono East     | Kintampo                     | Transition             | sylvatic/savanna          | no <i>A. aegypti</i> found, <i>A. africanus</i> found to be widespread          | [35] |
| 1969 | Northern      | Pong-Tamale                  | Guinea Savannah        | sylvatic/savanna          | only 2/246 houses with <i>A. aegypti</i> larvae                                 | [36] |
| 1969 | Upper East    | Bolgatanga                   | Sudan Savannah         | urban                     | house index 11%                                                                 | [36] |
| 1970 | Eastern       | Akim-Manso, Asikasu, Akwatia | Forest                 | urban                     | <i>A. aegypti</i> found breeding in all towns, house index as high as 50%       | [36] |
| 1977 | Upper West    | Jirapa                       | Sudan Savannah         | urban                     | house index 9.1%, container index 5.9%, Breteau 14%                             | [23] |
| 1978 | Eastern       | Maase                        | Forest                 | urban                     | house index 36.4%, container index 38%, Bretau index 96%                        | [23] |
| 1978 | Volta         | Hohoe, Kpandu                | Forest/Guinea Savannah | urban                     | house index 4-16%, container index 3-7%, Bretau index 4-16%                     | [23] |
| 1983 | Savannah      | Damongo                      | Guinea Savannah        | sylvatic/savanna to urban | laboratory confirmed deaths of baboons at Mole reserve, subsequent urban spread | [37] |
| 2006 | Bono East     | Kountaya village             | Guinea Savannah        | sylvatic/savanna          | single case in village near forest                                              | [38] |
| 2011 | Upper         | Kassena-                     | Sudan                  | sylvatic/savanna          | index case went to a                                                            | [39] |

|                                                                    |          |              |                 |                  |                                  |      |
|--------------------------------------------------------------------|----------|--------------|-----------------|------------------|----------------------------------|------|
|                                                                    | East     | Nankana West | Savannah        |                  | farm in a forest border          |      |
| 2021                                                               | Savannah | West Gonja   | Guinea Savannah | sylvatic/savanna | initial cases in savanna habitat | [15] |
| *Additional categorized outbreaks and cases in online dataset [20] |          |              |                 |                  |                                  |      |

294

295 The covariates selected for the final models and their relative contributions are shown in  
 296 Table 3. The average habitat suitability models for YF in Ghana are shown in Fig 3. The  
 297 minimum training presence threshold was used to translate these models into the binary maps in  
 298 Fig 4. The overall YF model (AUC 0.846) included landcover, precipitation of the driest quarter  
 299 (BIO17), human population density, annual mean temperature (BIO1), and elevation. The model  
 300 that excluded confirmed urban YF occurrences (AUC 0.880) also included landcover and  
 301 precipitation of driest quarter (BIO17), as well as precipitation of wettest quarter (BIO16) and  
 302 mean temperature of the driest quarter (BIO9). The most important type of landcover based on  
 303 the response curves for the models was dense herbaceous vegetation. Human population density  
 304 had the highest permutation importance and jackknife variable importance for the overall YF  
 305 model. Precipitation of the driest quarter (BIO17) had the highest permutation importance and  
 306 jackknife variable importance for the model excluding urban YF. The overall YF model  
 307 predicted 20/21 (95%) of occurrences tested at the minimum training presence threshold. The  
 308 model excluding urban YF predicted 14/15 (93%) of occurrences at the same threshold. The only  
 309 location that was not predicted by both models at the minimum training presence threshold was a  
 310 single case of likely sylvatic YF in Sene district of the Bono East region. Both models identified  
 311 regions and districts with recent YF outbreaks as having high suitability including Upper West,  
 312 Upper East, North East, Savannah, Northern, Bono, and Bono East regions. The overall YF  
 313 model identified all regions in Ghana as having areas of suitable habitat for YF.

314 **Fig 3. Predicted Habitat Suitability for YF in Ghana**



315 The left panel shows the average Maxent cumulative output for models including 21 YF  
 316 occurrences in Ghana and the following covariates: human population density, elevation,  
 317 landcover, precipitation of driest quarter (BIO17), and annual mean temperature (BIO 1). The  
 318 right panel shows the average output of the models excluding 6 confirmed urban YF occurrences  
 319 and includes the following covariates: precipitation of driest quarter (BIO17), precipitation of  
 320 wettest quarter (BIO16), landcover, and mean temperature of driest quarter (BIO9).

321

322 **Fig 4. Predicted Habitat Suitability for YF in Ghana based on the Minimum Training**  
 323 **Presence Threshold**

324 These binary habitat suitability maps represent areas greater or equal to the minimum training  
 325 presence threshold (MTP) for each group of YF models. The MTP is defined as the lowest  
 326 predicted habitat suitability value for the occurrences in the training data. Therefore, the  
 327 highlighted areas above the MTP represent locations with ecological conditions at least as  
 328 favorable as the location with the least suitable known YF occurrence in Ghana.

329

330

Table 3. Contribution of final covariates to YF habitat suitability models

| Model                     | Covariate                                 | Percent Contribution* | Permutation Importance † |
|---------------------------|-------------------------------------------|-----------------------|--------------------------|
| <b>Excluding Urban YF</b> | BIO17 (Precipitation of Driest Quarter)   | 29.4                  | 63.8                     |
|                           | BIO16 (Precipitation of Wettest Quarter)  | 11.2                  | 26.5                     |
|                           | Landcover                                 | 50.5                  | 9.3                      |
|                           | BIO9 (Mean Temperature of Driest Quarter) | 8.9                   | 0.3                      |
| <b>Overall YF</b>         | Human Population Density                  | 46.3                  | 35.1                     |
|                           | Elevation                                 | 15                    | 23                       |
|                           | Landcover                                 | 25.5                  | 14.8                     |
|                           | BIO17 (Precipitation of Driest Quarter)   | 6.1                   | 14.5                     |
|                           | BIO1 (Annual Mean Temperature)            | 7.1                   | 12.6                     |

\* Total model gain attributed to particular covariate, determined heuristically

†The importance of each covariate calculated from randomly changing values of a covariate and calculating decrease in model performance. The average performance decrease for each covariate is normalized, resulting in percentages.

331

## 332 **Discussion**

333 Our analysis estimates the historical epidemiology and ecology of YF in Ghana as well as  
334 areas at potential risk for future emergence of YF. We found that the geographic distribution and  
335 disease burden of YF in Ghana have changed since the introduction of routine childhood  
336 vaccination in 1992. While many historical outbreaks have occurred through the urban cycle,  
337 recent outbreaks appear to have originated from the sylvatic or savanna cycles. Therefore, there  
338 appears to be a higher risk for YF outbreaks originating among unvaccinated populations in  
339 environments where the appropriate vectors, NHPs, and human hosts are present to maintain the  
340 sylvatic or savanna cycles. Using machine learning we identified these potential suitable habitats  
341 on a more granular scale in Ghana as well as factors that should be considered when predicting  
342 YF based on different transmission cycles.

343 The overall mean CFR we calculated for YF in Ghana (37.4%) was similar to the mean  
344 CFR from a recent meta-analysis of global YF cases (39%) and severe cases in African countries  
345 (36%) [5]. Given that there is limited surveillance and diagnostic capacity for YF in Ghana, our  
346 data likely underestimate of the true burden of YF (while overestimating the true CFR) given  
347 that mild or subclinical infections may not be detected. The YF cases in our study more likely  
348 reflect severe YF, and it is estimated that ~15% of YF cases are from severe YF. If only severe  
349 YF cases were captured in our dataset, this would suggest that over 15,000 cases of YF have  
350 occurred in Ghana since 1910 – a number that may be even higher given historical and current  
351 limitations in diagnosing YF. Both the number of cases and the case-fatality of YF have declined  
352 in Ghana since 1992, likely in part due to introduction of routine childhood YF vaccination in

353 1992. Nevertheless, YF outbreaks continue to occur, highlighting the need for ongoing risk  
354 prediction and surveillance.

355 The geographic distribution, epidemiology, and ecology of YF outbreaks in Ghana has  
356 changed substantially over the past century. During the first half of the 20<sup>th</sup> century, the majority  
357 of YF outbreaks were detected along coastal regions and periodically in the north, with large  
358 outbreaks occurring roughly every 10 years [21]. Relatively higher population density and the  
359 presence of susceptible foreign populations likely contributed to these urban YF outbreaks.  
360 Detection bias also likely contributed to these observations given differences in accessibility to  
361 diagnostics and reporting. The requirement for YF immunization among foreigners in 1945, local  
362 reactive vaccination campaigns, and increasing diagnostic recognition likely contributed to the  
363 changing distribution of YF outbreaks with greater recognition of outbreaks in more remote  
364 northern regions. In the context of increasing vaccination coverage for YF in Ghana, recent  
365 outbreaks have originated among unvaccinated populations in rural areas and border districts in  
366 the Guinea Savannah and Sudan Savannah agro-climatic zones. These areas may have more  
367 nomadic pastoralist communities and as well as immigrants from neighboring countries,  
368 potentially contributing to lower vaccination coverage. Recent YF outbreaks appear to reflect the  
369 sylvatic and savanna cycles, which could transition into the urban cycle if there are sufficient  
370 susceptible hosts. We found at least one large historical outbreak that began in the  
371 sylvatic/savanna cycle and then spread to multiple other regions through the urban cycle. Climate  
372 change, urbanization, and changing human population movements could fuel the spread of  
373 sylvatic/savanna YF to urban outbreaks.

374 The Upper West, Savannah, and Upper East regions have experienced the majority of YF  
375 cases in outbreaks since routine immunization. Our models identified these regions as well as

376 neighboring regions (Upper East, North East, Northern, Bono, and Bono East) as being highly  
377 suitable for YF emergence. The West Gonja district where the 2021 YF outbreak originated is  
378 located near Mole National Park (Figure 2), which is the largest protected area in Ghana and is  
379 likely suitable habitat for the NHPs and mosquitoes that could maintain the sylvatic and savanna  
380 cycles of YF. Mole National Park is also a tourist site where nomadic populations may work and  
381 also has surrounding pastoralist communities [40]. The 1983 YF outbreak was also believed to  
382 have originated from this area given the finding of laboratory confirmed deaths of baboons with  
383 YF [37]. Reviewing the locations of historical YF emergence, we found additional locations with  
384 recurring cases, which could also be hotspots for YF. At least four outbreaks appear to have  
385 originated in the Jirapa district in the Upper West and three in Bawku Municipal district in the  
386 Upper East. During the 2021 outbreak there were two cases from Tinga village in the Bole  
387 region, and given the distance from the epicenter of the outbreak it is possible that this could  
388 have been a separate YF emergence event. This village also had clinically diagnosed cases of YF  
389 in 1983. While there have been isolated cases of sylvatic/savanna YF since routine  
390 immunization, with index cases exposed to forest-savanna ecotones, these cases did not lead to  
391 sustained outbreaks. In contrast, a significant unvaccinated population likely contributed to the  
392 2021-2022 outbreak. Therefore, identifying both susceptible populations as well as the habitat  
393 for YF emergence will be crucial for predicting areas at future risk.

394 We used confirmed human cases and machine learning to identify likely suitable habitats  
395 for the emergence of YF in Ghana. The models do not represent the distribution or ecological  
396 niche of YFV, but instead represent habitats with similar conditions to where prior YF cases  
397 occurred. Given that YF can start in the sylvatic/savanna cycles and then spread through urban  
398 cycle, we also created a set of models excluding confirmed urban YF cases to provide a better

399 prediction of habitats where outbreaks may originate. This model is a proxy for the habitats  
400 similar to where savanna/sylvatic cases have occurred, which appears to be the likely origin of  
401 recent and future YF outbreaks in Ghana. Because we used the location of residence or  
402 healthcare facility for our occurrences, the habitats identified by this model do not reflect where  
403 YFV circulates in the savanna/sylvatic cycle, but instead habitats similar to where human cases  
404 from these cycles have been detected.

405 To our knowledge, this is the first time that the different ecological cycles of YF have  
406 been integrated into spatial models in Africa. Overall these models illustrate the important  
407 differences in habitats and locations where YF may occur in Ghana. For example, while  
408 landcover, precipitation, and temperature are important covariates in both sets of models, human  
409 population density was the most important covariate for models that included outbreaks from the  
410 urban cycle— reflecting the fact that the urban cycle requires a higher density of susceptible  
411 human hosts compared to the sylvatic/savanna cycles. In contrast, precipitation of the driest  
412 quarter was the most important covariate for the model that excluded urban YF. Predictive  
413 models that do not distinguish between the ecological cycles of YF will risk misidentifying areas  
414 at risk for emergence. For instance, our models excluding urban cases reflect habitat similar to  
415 where the recent YF outbreaks have originated in Ghana and could be a better predictor for  
416 where future outbreaks may originate. In contrast, the overall model is more appropriate for  
417 predicting areas where YF may spread through the urban cycle. Therefore, it is important that  
418 researchers think carefully about the goals and inferences of their models based on YF ecology  
419 and epidemiology.

420 There are multiple limitations to our analysis. We used reported YF cases from the  
421 literature and online reports, and there were relatively few laboratory confirmed historical cases.

422 For our habitat suitability models, we used strict inclusion criteria of confirmed cases since 1960  
423 with georeferenced locations, limiting our analysis to 21 total occurrences. We used AUC values  
424 to compare the relative performance between models, but AUC values can be inflated in  
425 presence-only models such as Maxent. We attempted to minimize this inflation and reduce  
426 overfitting by using the LOOCV approach and a small number of covariates. Another limitation  
427 was sparse epidemiologic and entomologic surveillance data for most outbreaks. Vector indices  
428 were only available for some of the occurrences, so we had to make assumptions about certain  
429 outbreaks that lacked entomologic data, and we only excluded confirmed urban YF locations in  
430 our second set of models. Similarly, it is possible that both urban and savanna/sylvatic cycles  
431 may occur together during outbreaks. For example, while the 2021 YF outbreak may have  
432 originated in the savanna/sylvatic cycle, it could have spread through dwellings via the urban  
433 cycle. We categorized this outbreak and similar outbreaks as originating from the  
434 savanna/sylvatic cycle since our goal was to model habitat for YF emergence. The alternative  
435 explanation, that this YF outbreak originated from the urban cycle of another outbreak, seemed  
436 less likely given lack of nearby preceding outbreaks. Overall, additional vector surveillance data  
437 are needed for further clarity. Lastly, the covariates we chose for our models were intended to  
438 reflect habitat suitability via presence of the appropriate climatic conditions, environments, and  
439 hosts. To make models more reflective of relative risk for future outbreaks, they would need to  
440 include additional explanatory variables, most importantly YF vaccination coverage.

441 Despite these limitations, our study has important implications for preparing for future  
442 outbreaks of YF in Ghana. For example, our models could be used to inform further risk  
443 assessment which could guide diagnostic testing, vector control, and vaccination campaigns. A  
444 committee of YF experts developed a WHO protocol for national risk assessment for YF [24].

445 However, the strategies in this protocol are resource intensive and involve sampling humans,  
446 vectors, and NHPs for YF. Our methods for estimating habitat suitability based on historical  
447 cases could be used to prioritize field surveillance for YF with the WHO risk assessment  
448 protocol [24]. Our findings also have important implications for models and risk maps for YF.  
449 While predictive models for YF risk have been made on a global scale [41–43], these models  
450 either contain sparse data from Ghana or do not predict subnational risk for YF. Additionally,  
451 these existing models do not distinguish between the different ecological cycles of YF in Africa,  
452 which may influence prediction and interpretation. Therefore, additional subnational data and  
453 local ecological knowledge are needed to create future risk maps for YF and other arboviruses if  
454 they are to be informative for national policymakers [9].

455 While the habitats suitable for YF emergence appear to cluster in the northern regions of  
456 Ghana, currently all YF diagnostic testing is done at the National Public Health Reference  
457 Laboratory in Korle Bu in the south of the country. Expanding YF diagnostic testing to the Zonal  
458 Public Health Laboratory in Tamale, which is close to recent YF outbreaks and predicted habitat  
459 suitability, could improve early detection of outbreaks. While the burden of YF has decreased  
460 since implementation of routine childhood vaccination in 1992, the recent outbreak has also  
461 demonstrated the risk for future outbreaks among unvaccinated groups. Identifying unvaccinated  
462 nomadic populations in habitats that are suitable for YF emergence will be an important step for  
463 preventing future outbreaks. Overall, despite a century of research on YF, critical questions  
464 remain regarding the ecology, epidemiology, and emergence of YF in African countries.

465 Addressing these research gaps and using this knowledge to inform public health interventions  
466 will be essential to improving health equity and preventing future YF epidemics.

467

## 468 **Funding**

469 This work was supported by the National Institute of Health T32 AI007291-32 to SDJ as well as  
470 R01AI136977 to DWD, LFS, FA, and EK. The content is solely the responsibility of the authors  
471 and does not necessarily represent the official views of the National Institutes of Health.

472

## 473 **Acknowledgements**

474 The authors would like to thank Dr. Eric Agboli for sharing the 2005 WHO YF in Ghana report  
475 and Dr. Sarah Louise Poynton for editing advice. They would also like to thank their colleagues  
476 at the Ghana Health Service, University of Ghana, and Noguchi Memorial Institute for Medical  
477 Research.

478

## 479 **Author contributions**

480 Conceptualization, Data curation, Analysis, Writing-original Draft: SDJ

481 Methodology: SDJ, TF

482 Writing-reviewing and editing: SDJ, DWD, LFS, TF, FA, EK, AB

483 Funding: DWD, LFS, FA, EK

484

## 485 **References**

486 1. Monath TP, Vasconcelos PFC. Yellow fever. *Journal of Clinical Virology*. 2015;64: 160–  
487 173. doi:10.1016/J.JCV.2014.08.030

488 2. Gaythorpe KAM, Jean K, Cibrelus L, Garske T. Quantifying model evidence for yellow  
489 fever transmission routes in Africa. *PLoS Comput Biol*. 2019;15: e1007355.  
490 doi:10.1371/journal.pcbi.1007355

491 3. Jean K, Hamlet A, Benzler J, Cibrelus L, Gaythorpe KAM, Sall A, et al. Eliminating yellow  
492 fever epidemics in Africa: Vaccine demand forecast and impact modelling. *PLOS Neglected  
493 Tropical Diseases*. 2020;14: e0008304. doi:10.1371/JOURNAL.PNTD.0008304

494 4. Regional Committee for Africa. Progress report on the implementation of the regional  
495 strategy for health security and emergencies 2016–2020: information document. World



- 496 Health Organization. Regional Office for Africa; 2019. Report No.: AFR/RC69/INF.DOC/1.  
497 Available: <https://apps.who.int/iris/handle/10665/331442>
- 498 5. Nwaiwu AU, Musekiwa A, Tamuzi JL, Sambala EZ, Nyasulu PS. The incidence and  
499 mortality of yellow fever in Africa: a systematic review and meta-analysis. *BMC Infectious*  
500 *Diseases*. 2021;21: 1–11. doi:10.1186/S12879-021-06728-X/FIGURES/4
- 501 6. Hamlet A, Ramos DG, Gaythorpe KAM, Romano APM, Garske T, Ferguson NM.  
502 Seasonality of agricultural exposure as an important predictor of seasonal yellow fever  
503 spillover in Brazil. *Nature communications*. 2021;12. doi:10.1038/S41467-021-23926-Y
- 504 7. World Health Organization. A global strategy to eliminate yellow fever epidemics (EYE)  
505 2017–2026. Geneva: World Health Organization; 2018. Available:  
506 <https://apps.who.int/iris/handle/10665/272408>
- 507 8. Eliminate yellow fever epidemics (EYE) strategy 2017-2026. [cited 5 Mar 2023]. Available:  
508 <https://www.who.int/initiatives/eye-strategy>
- 509 9. Judson SD, LeBreton M, Fuller T, Hoffman RM, Njabo K, Brewer TF, et al. Translating  
510 Predictions of Zoonotic Viruses for Policymakers. *EcoHealth*. 2017. doi:10.1007/s10393-  
511 017-1304-3
- 512 10. Aliaga-Samanez A, Real R, Segura M, Marfil-Daza C, Olivero J. Yellow fever surveillance  
513 suggests zoonotic and anthroponotic emergent potential. *Communications Biology* 2022 5:1.  
514 2022;5: 1–12. doi:10.1038/s42003-022-03492-9
- 515 11. de Thoisy B, Silva NIO, Sacchetto L, Trindade G de S, Drumond BP. Spatial epidemiology  
516 of yellow fever: Identification of determinants of the 2016-2018 epidemics and at-risk areas  
517 in Brazil. *PLOS Neglected Tropical Diseases*. 2020;14: e0008691.  
518 doi:10.1371/JOURNAL.PNTD.0008691
- 519 12. Yamba EI, Aryee JNA, Quansah E, Davies P, Wemegah CS, Osei MA, et al. Revisiting the  
520 agro-climatic zones of Ghana: A re-classification in conformity with climate change and  
521 variability. *PLOS Climate*. 2023;2: e0000023. doi:10.1371/journal.pclm.0000023
- 522 13. Yellow Fever (YF) vaccination coverage. [cited 28 Sep 2022]. Available:  
523 <https://immunizationdata.who.int/pages/coverage/yfv.html?CODE=GHA&YEAR=>
- 524 14. Bonney JHK, Sanders T, Pratt D, Agbodzi B, Laryea D, Agyeman NKF, et al. Molecular  
525 Characterization of Circulating Yellow Fever Viruses from Outbreak in Ghana, 2021–2022 -  
526 Volume 29, Number 9—September 2023 - *Emerging Infectious Diseases journal* - CDC.  
527 [cited 29 Aug 2023]. doi:10.3201/eid2909.221671
- 528 15. World Health Organization. Disease Outbreak News; Yellow Fever - Ghana. 1 Dec 2021  
529 [cited 1 Aug 2023]. Available: [https://www.who.int/emergencies/disease-outbreak-](https://www.who.int/emergencies/disease-outbreak-news/item/yellow-fever---ghana)  
530 [news/item/yellow-fever---ghana](https://www.who.int/emergencies/disease-outbreak-news/item/yellow-fever---ghana)

- 531 16. World Health Organization. Yellow Fever - West and Central Africa. In: Disease Outbreak  
532 News [Internet]. 23 Dec 2021 [cited 17 Jan 2024]. Available:  
533 [https://www.who.int/emergencies/disease-outbreak-news/item/yellow-fever---west-and-](https://www.who.int/emergencies/disease-outbreak-news/item/yellow-fever---west-and-central-africa)  
534 [central-africa](https://www.who.int/emergencies/disease-outbreak-news/item/yellow-fever---west-and-central-africa)
- 535 17. WHO report on global surveillance of epidemic-prone infectious diseases. [cited 2 Dec  
536 2023]. Available: [https://www.who.int/publications-detail-redirect/WHO-CDS-CSR-ISR-](https://www.who.int/publications-detail-redirect/WHO-CDS-CSR-ISR-2000.1)  
537 [2000.1](https://www.who.int/publications-detail-redirect/WHO-CDS-CSR-ISR-2000.1)
- 538 18. WHO. Yellow Fever Cases Reported in Ghana, 1950–2004. World Health Organization;  
539 2005.
- 540 19. Agboli E, Tomazatos A, Maiga-Ascofaré O, May J, Lühken R, Schmidt-Chanasit J, et al.  
541 Arbovirus Epidemiology: The Mystery of Unnoticed Epidemics in Ghana, West Africa.  
542 2022. doi:10.3390/microorganisms10101914
- 543 20. Yellow Fever in Ghana: Predicting Emergence and Ecology from Historical Outbreaks  
544 (Datasets). figshare; 2023. doi:10.6084/m9.figshare.24747165
- 545 21. Scott D. Epidemic Disease in Ghana 1901-1960. London: Oxford University Press; 1965.
- 546 22. WHO. Yellow fever in Africa and South America, 2011-2012 = Fièvre jaune en Afrique et  
547 en Amérique du Sud, 2011-2012. Weekly Epidemiological Record = Relevé  
548 épidémiologique hebdomadaire. 2013;88: 285–296.
- 549 23. Agadzi VK, Boatman BA, Appawu MA, Mingle JA, Addy PA. Yellow fever in Ghana, 1977-  
550 80. Bulletin of the World Health Organization. 1984;62: 577.
- 551 24. Risk assessment on yellow fever virus circulation in endemic countries. [cited 7 Nov 2023].  
552 Available: <https://www.who.int/publications-detail-redirect/WHO-HSE-PED-CED-2014-2>
- 553 25. Judson SD, Fischer R, Judson A, Munster VJ. Ecological Contexts of Index Cases and  
554 Spillover Events of Different Ebolaviruses. PLOS Pathogens. 2016;12: e1005780.  
555 doi:10.1371/journal.ppat.1005780
- 556 26. Phillips SJ, Anderson RP, Schapire RE. Maximum entropy modeling of species geographic  
557 distributions. Ecological Modelling. 2006;190: 231–259.  
558 doi:10.1016/j.ecolmodel.2005.03.026
- 559 27. van Proosdij ASJ, Sosef MSM, Wieringa JJ, Raes N. Minimum required number of specimen  
560 records to develop accurate species distribution models. Ecography. 2016;39: 542–552.  
561 doi:10.1111/ecog.01509
- 562 28. Merow C, Smith MJ, Silander Jr JA. A practical guide to MaxEnt for modeling species'  
563 distributions: what it does, and why inputs and settings matter. Ecography. 2013;36: 1058–  
564 1069. doi:10.1111/j.1600-0587.2013.07872.x

- 565 29. Hijmans RJ, Cameron SE, Parra JL, Jones PG, Jarvis A. Very high resolution interpolated  
566 climate surfaces for global land areas. *International Journal of Climatology*. 2005;25: 1965–  
567 1978. doi:10.1002/joc.1276
- 568 30. Friedl MA, Sulla-Menashe D, Tan B, Schneider A, Ramankutty N, Sibley A, et al. MODIS  
569 Collection 5 global land cover: Algorithm refinements and characterization of new datasets.  
570 *Remote Sensing of Environment*. 2010;114: 168–182. doi:10.1016/j.rse.2009.08.016
- 571 31. International Union for Conservation of Nature - IUCN, Center for International Earth  
572 Science Information Network - CIESIN - Columbia University. Gridded Species  
573 Distribution: Global Mammal Richness Grids, 2015 Release. Palisades, New York: NASA  
574 Socioeconomic Data and Applications Center (SEDAC); 2015. Available:  
575 <https://doi.org/10.7927/H4N014G5>
- 576 32. Center for International Earth Science Information Network - CIESIN - Columbia  
577 University. Gridded Population of the World, Version 4 (GPWv4): Population Density  
578 Adjusted to Match 2015 Revision UN WPP Country Totals, Revision 11. Palisades, New  
579 York: NASA Socioeconomic Data and Applications Center (SEDAC); 2018. Available:  
580 <https://doi.org/10.7927/H4F47M65>
- 581 33. Pearson RG, Raxworthy CJ, Nakamura M, Townsend Peterson a. Predicting species  
582 distributions from small numbers of occurrence records: A test case using cryptic geckos in  
583 Madagascar. *Journal of Biogeography*. 2007;34: 102–117. doi:10.1111/j.1365-  
584 2699.2006.01594.x
- 585 34. Phillips S. A Brief Tutorial on Maxent. *AT&T Research*. 2005;190: 231–259.
- 586 35. Boorman JPT, Porterfield JS. A small outbreak of yellow fever in the Gold Coast.  
587 *Transactions of The Royal Society of Tropical Medicine and Hygiene*. 1957;51: 439–449.  
588 doi:10.1016/0035-9203(57)90079-2
- 589 36. Beausoleil EG, Mukhese AB, Grant FC, Herron CA. Surveillance of yellow fever in Ghana,  
590 1960 et 1970. *ORSTOM Ser Entomol Med Parasitol*. 1972;10: 99–101.
- 591 37. P.A.K. ADDY KM and VKA. Recent Yellow Fever Epidemics in Ghana (1969-1983).  
592 *EAST AFRICAN MEDICAL JOURNAL*. 1986;63.
- 593 38. World Health Organization. *Weekly Epidemiological Record*, 2008, vol. 83, 08 [full issue].  
594 *Weekly Epidemiological Record = Relevé épidémiologique hebdomadaire*. 2008;83: 69–76.
- 595 39. WHO. Yellow fever in Ghana. In: *Disease Outbreak News* [Internet]. 3 Feb 2012 [cited 3  
596 Dec 2023]. Available: [https://www.who.int/emergencies/disease-outbreak-](https://www.who.int/emergencies/disease-outbreak-news/item/2012_02_03b-en)  
597 [news/item/2012\\_02\\_03b-en](https://www.who.int/emergencies/disease-outbreak-news/item/2012_02_03b-en)
- 598 40. Inusah A-W, Collins G, Dzomeku P, Head Id M, Ziblim S-D. Knowledge, attitudes and  
599 practice towards yellow fever among nomadic populations: A cross-sectional study in yellow  
600 fever outbreak communities in Ghana. *PLOS Global Public Health*. 2023;3: e0000733.  
601 doi:10.1371/JOURNAL.PGPH.0000733

- 602 41. Shearer FM, Longbottom J, Browne AJ, Pigott DM, Brady OJ, Kraemer MUG, et al.  
603 Existing and potential infection risk zones of yellow fever worldwide: a modelling analysis.  
604 The Lancet Global Health. 2018;6: e270–e278. doi:10.1016/S2214-109X(18)30024-X
- 605 42. Jentes ES, Poumerol G, Gershman MD, Hill DR, Lemarchand J, Lewis RF, et al. The revised  
606 global yellow fever risk map and recommendations for vaccination, 2010: consensus of the  
607 Informal WHO Working Group on Geographic Risk for Yellow Fever. The Lancet  
608 Infectious Diseases. 2011;11: 622–632. doi:10.1016/S1473-3099(11)70147-5
- 609 43. Gaythorpe KAM, Hamlet A, Jean K, Ramos DG, Cibrelus L, Garske T, et al. The global  
610 burden of yellow fever. eLife. 2021;10. doi:10.7554/ELIFE.64670
- 611

612 **Supporting Information**

613

614 **S1 Fig. Yellow Fever Annual Cases and Deaths in Ghana 1910-2022**

615 The reported annual number of YF cases and deaths in Ghana since the first detected outbreak in  
616 1910 until 2022 are shown. Also depicted are the years of reactive YF vaccination campaigns  
617 and immunization policies.

618

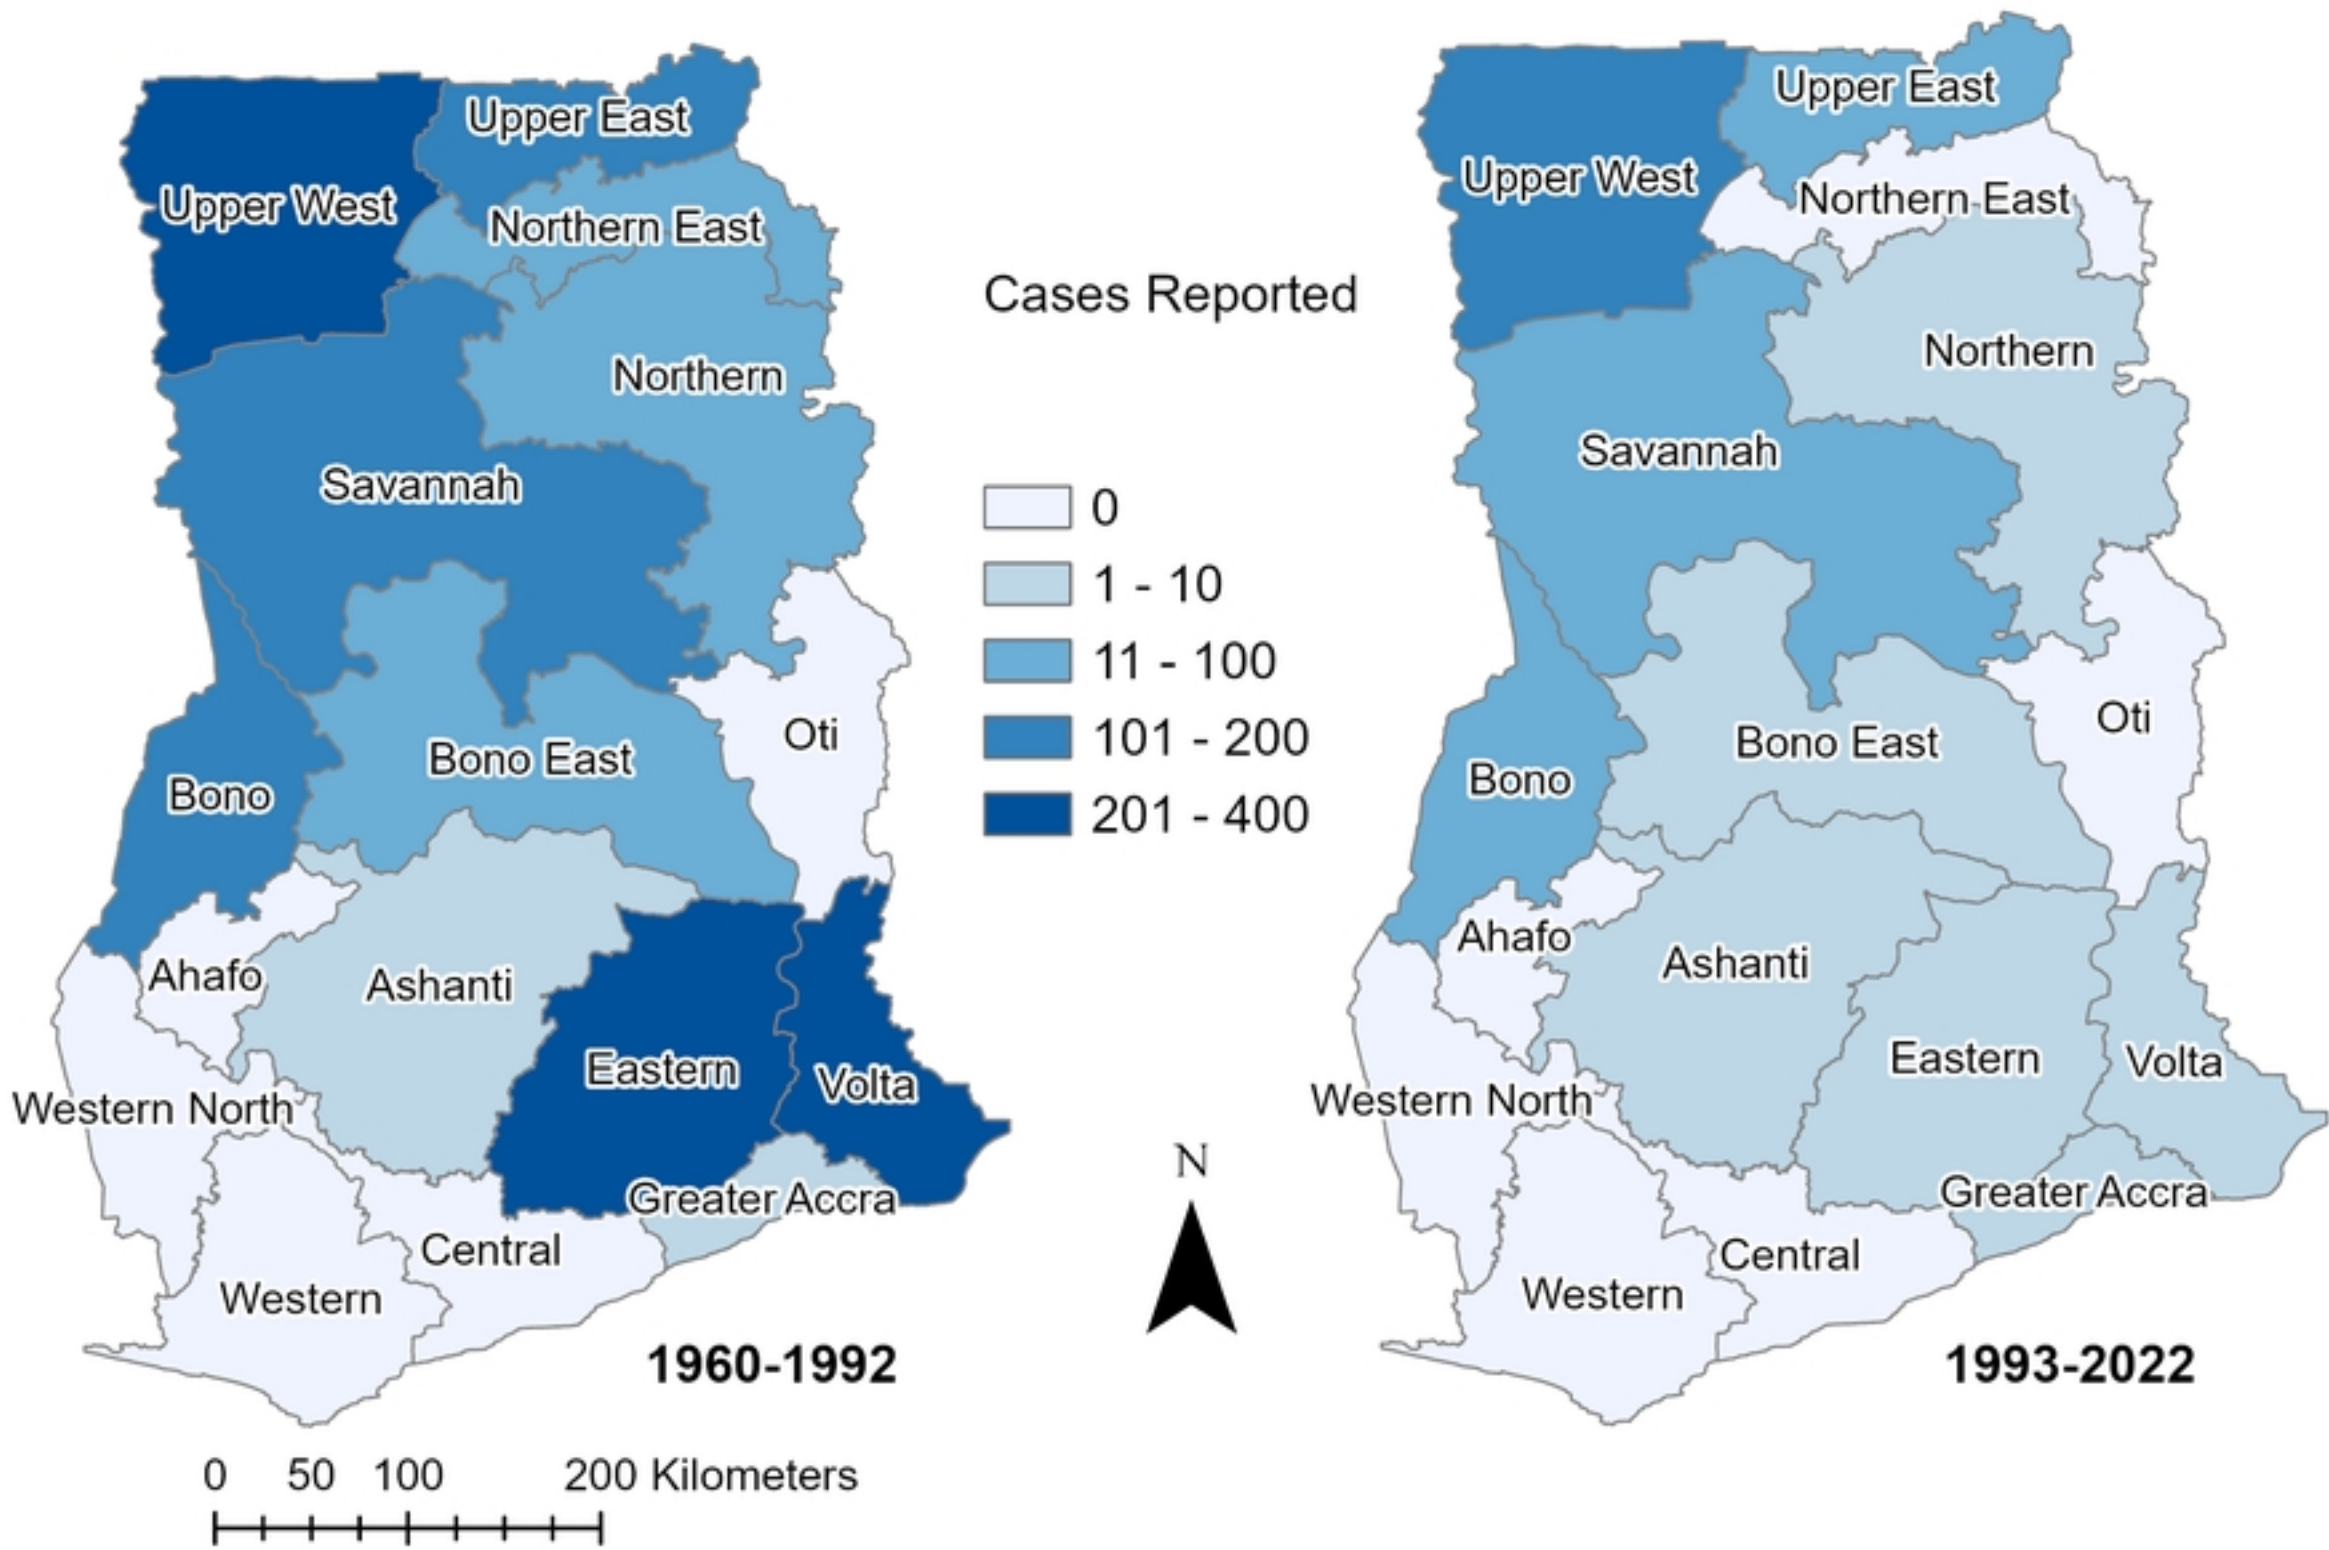

Figure 1

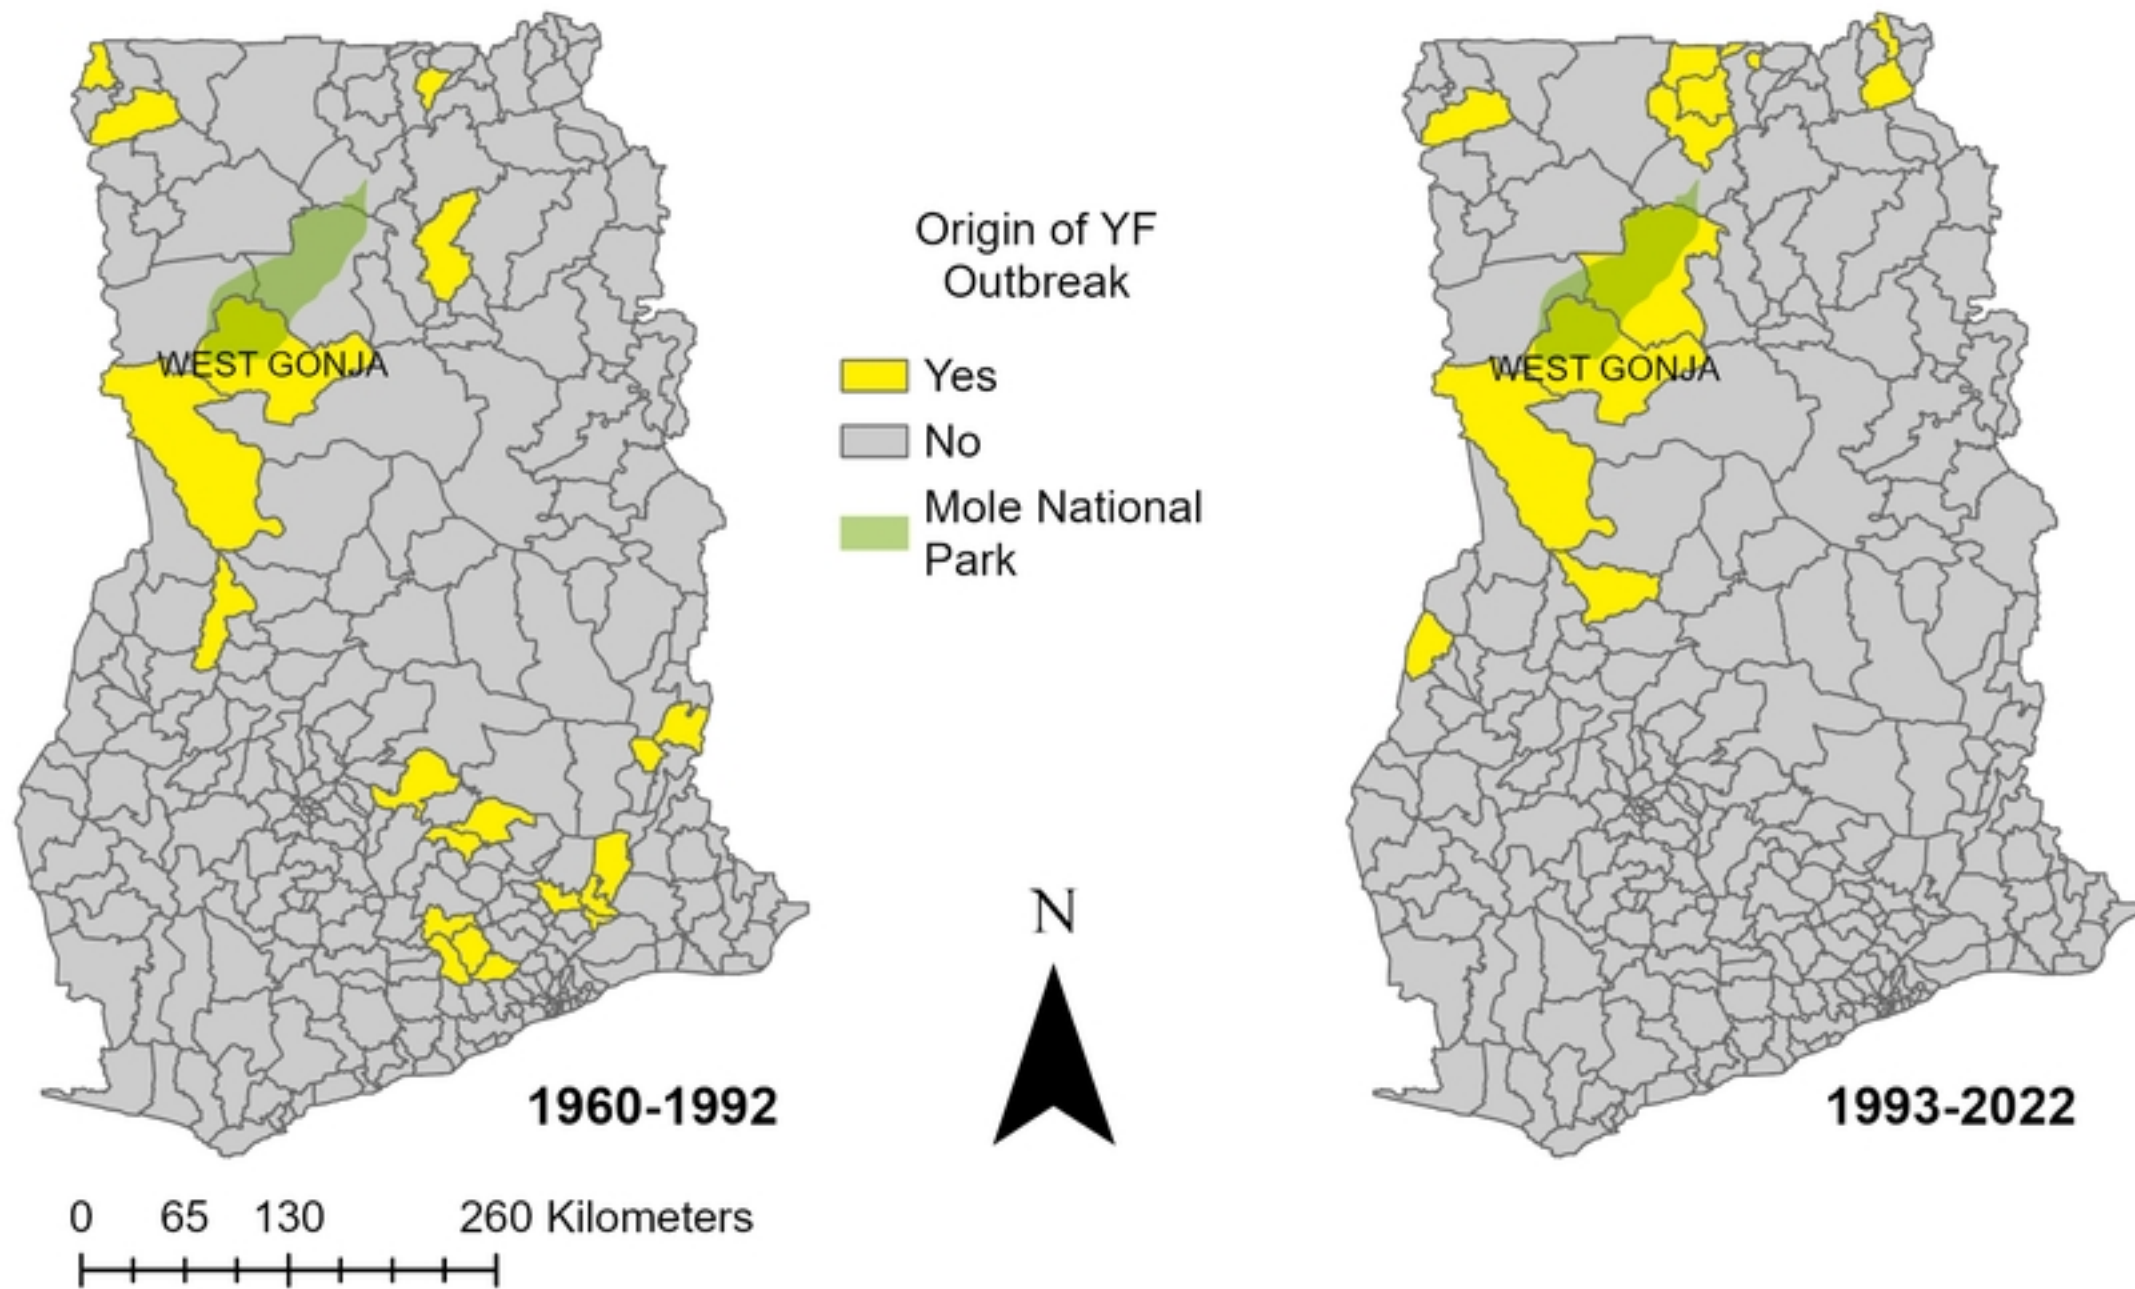

Figure 2

Overall YF Model

Model excluding urban YF

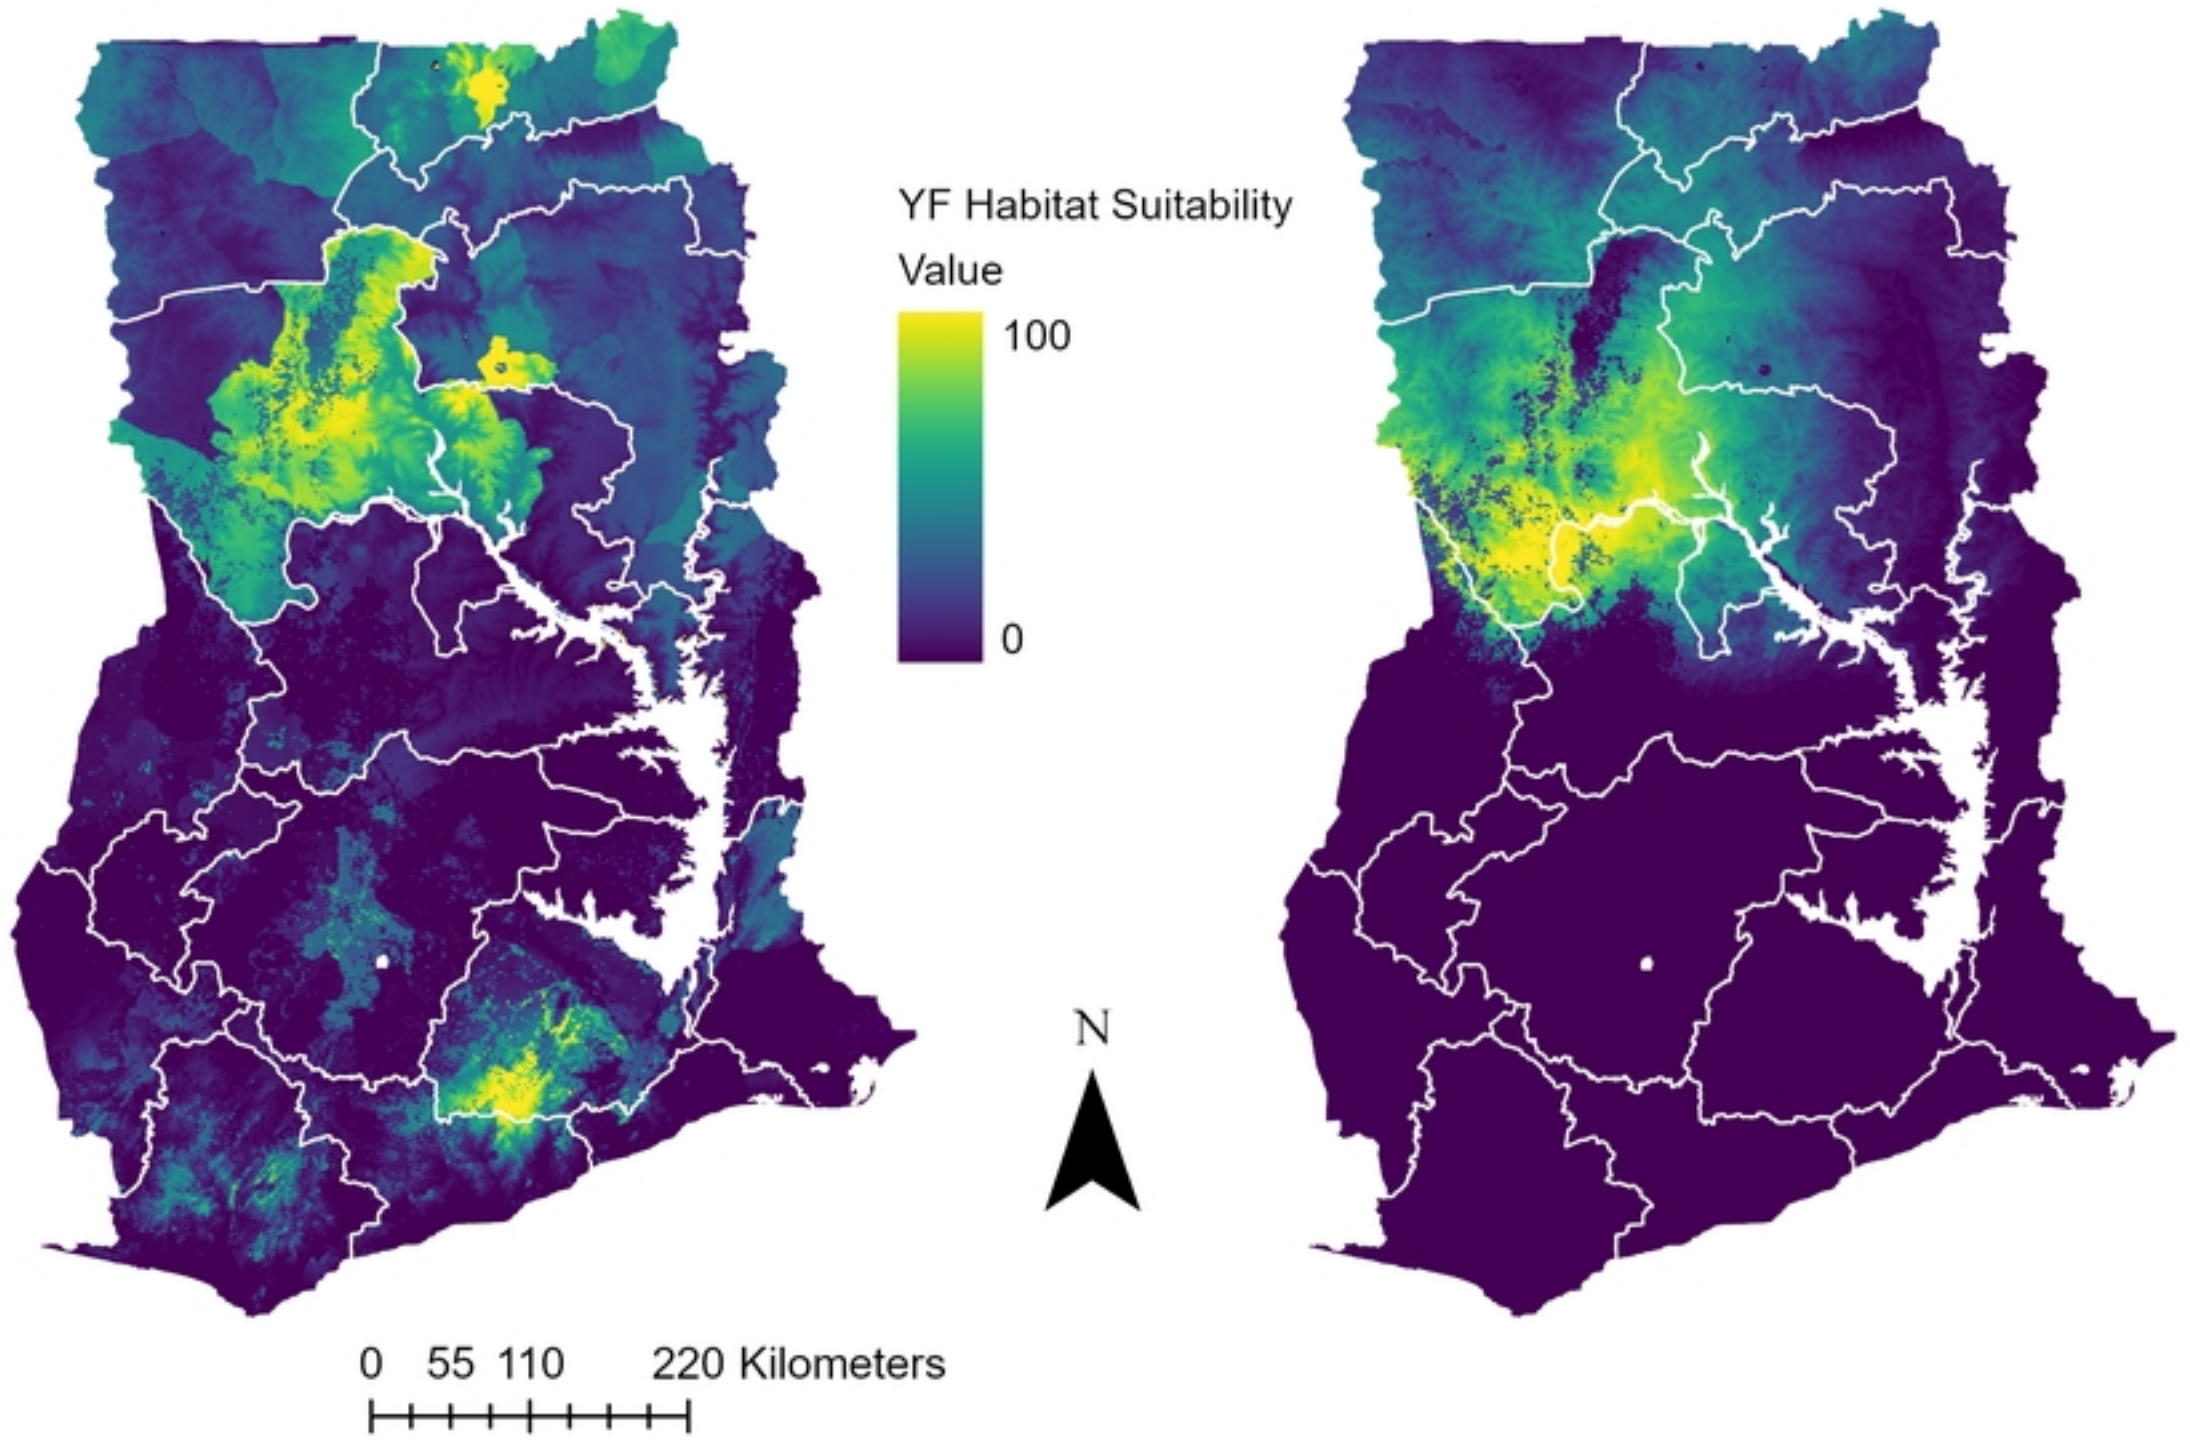

Figure 3



Overall YF Model

Model excluding urban YF

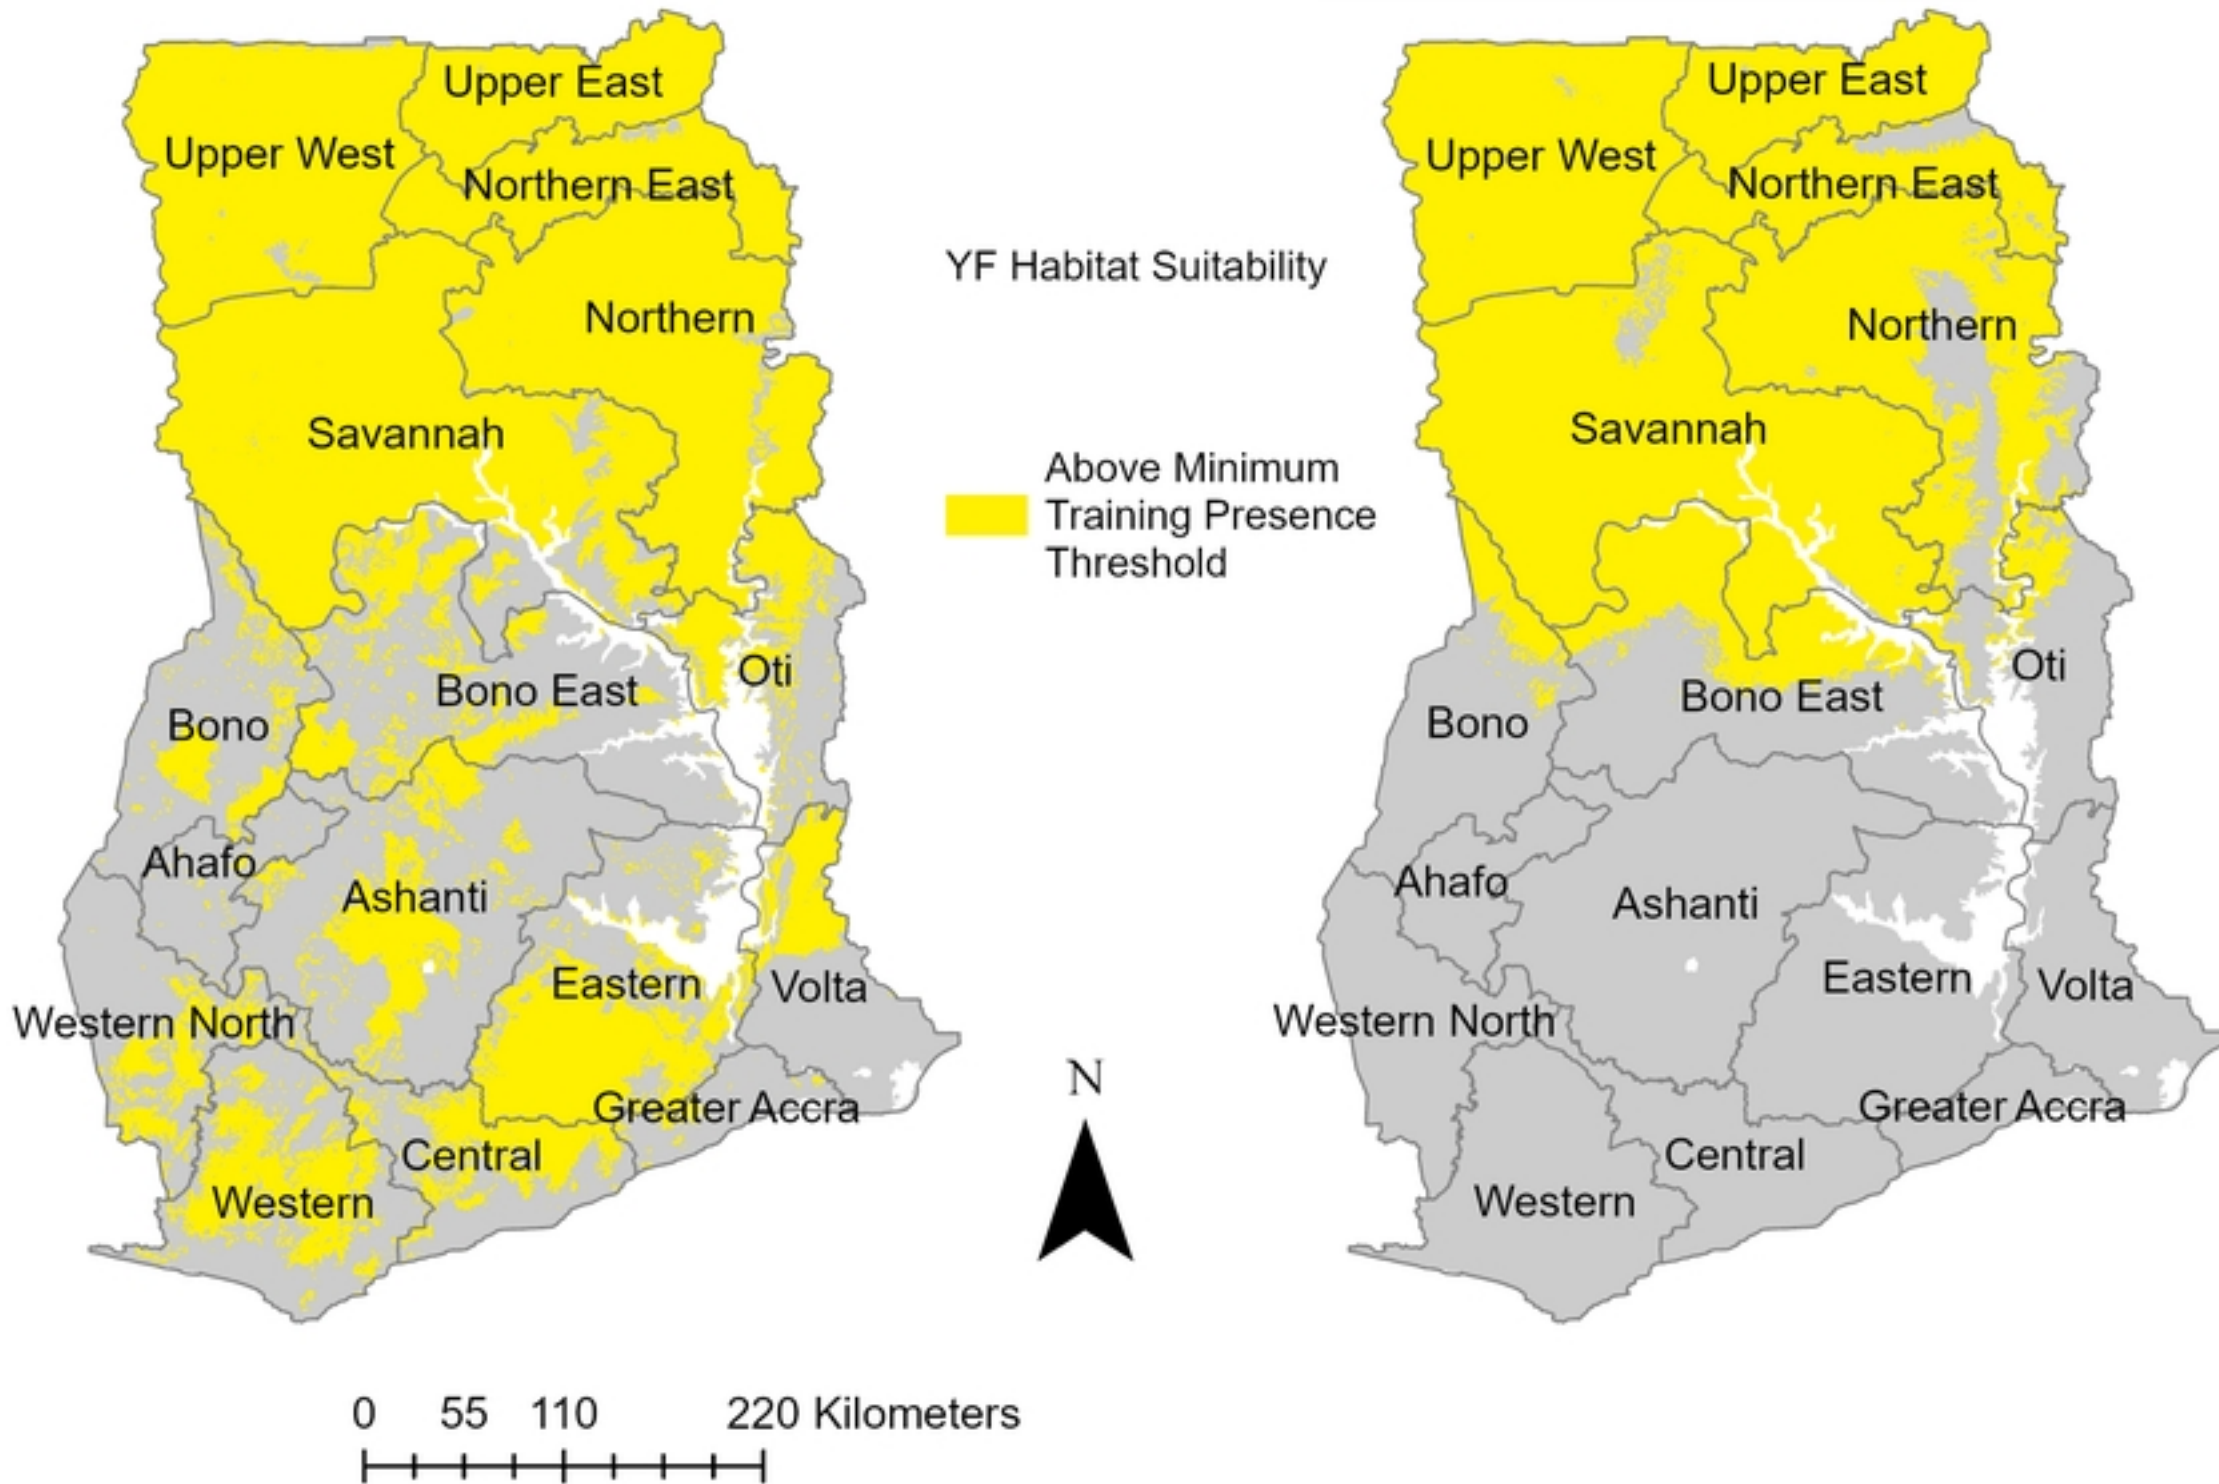

Figure 4
